# Supplementary material for: Engineering the electronic structure of FeP with rare earth elements to enhance the electrocatalytic hydrogen evolution performance
Source: Royal Society of Chemistry journal article supplement (doi:10.1039/d3ta03610c), 2023-01-01
Supplement: d3ta03610c1.pdf [file d3ta03610c1.pdf]

Electronic supplementary information for

**Engineering electronic structure of FeP with rare earth elements to promote the electrocatalytic hydrogen evolution performance**

Wei Gao<sup>a,#</sup>, Yujie Wu<sup>a,#</sup>, Xinhao Wan<sup>a</sup>, Jie Gao<sup>b</sup>, Dan Wen<sup>a,\*</sup>

*<sup>a</sup> State Key Laboratory of Solidification Processing, School of Materials Science and Engineering, Northwestern Polytechnical University, Xi'an, 710072, P. R. China*

*<sup>b</sup> School of Life Sciences, Northwestern Polytechnical University, Xi'an, 710072, P. R. China*

# W. Gao and Y. Wu contributed equally to this work.

\*Corresponding author should be addressed to D. Wen (dan.wen@nwpu.edu.cn)

Supplementary figures

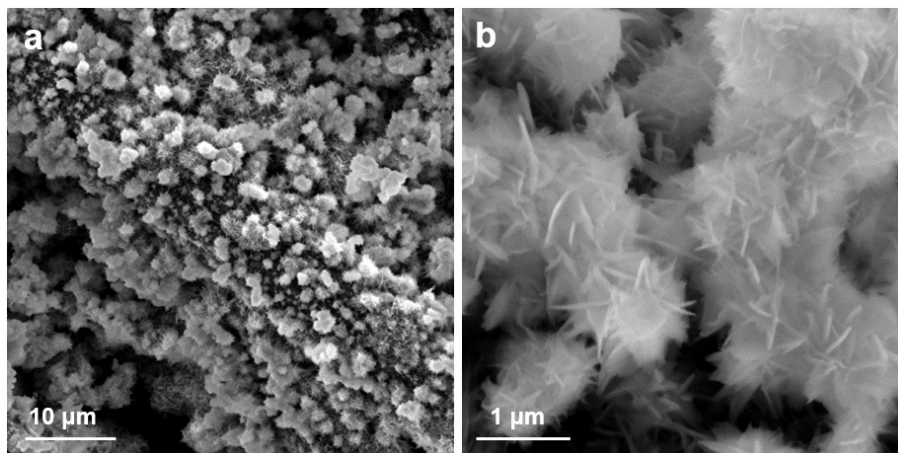

Figure s1. SEM images for FeP/CC sample with different magnifications.

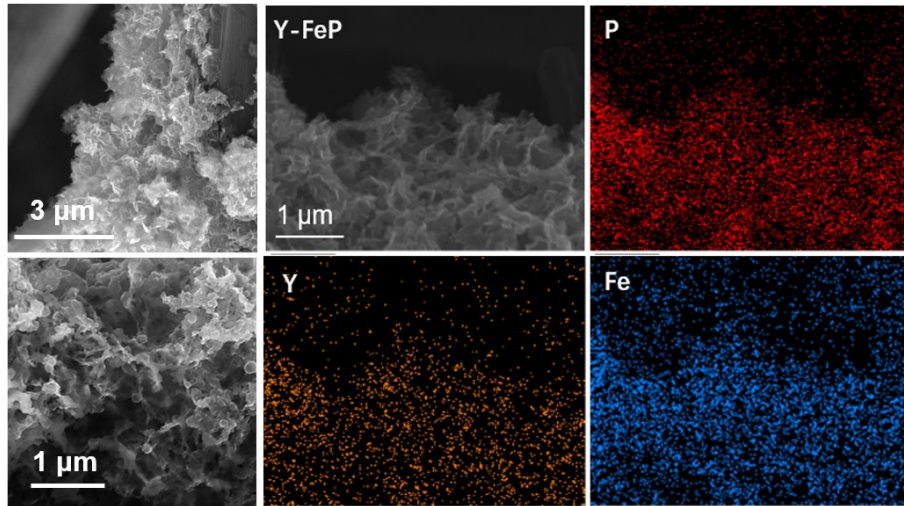

Figure s2. SEM and corresponding element mapping images for Y-FeP/CC.

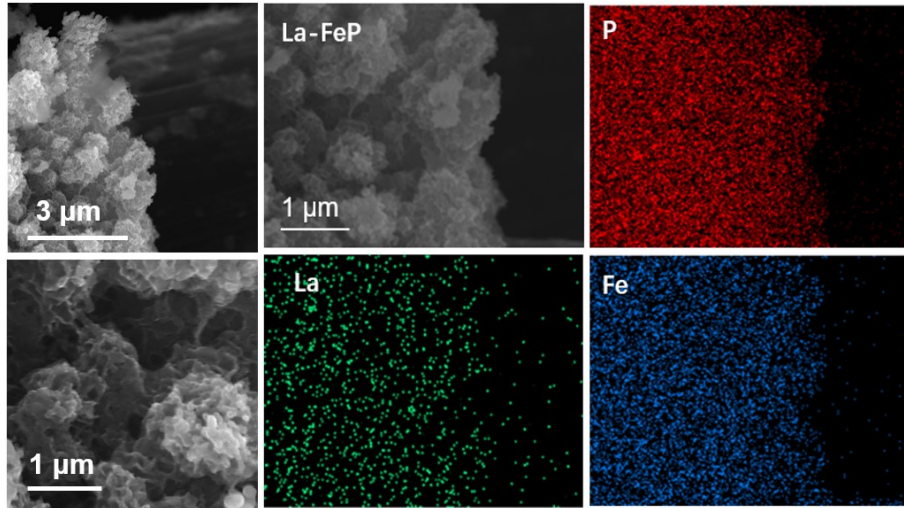

Figure s3. SEM and corresponding element mapping images for La-FeP/CC.

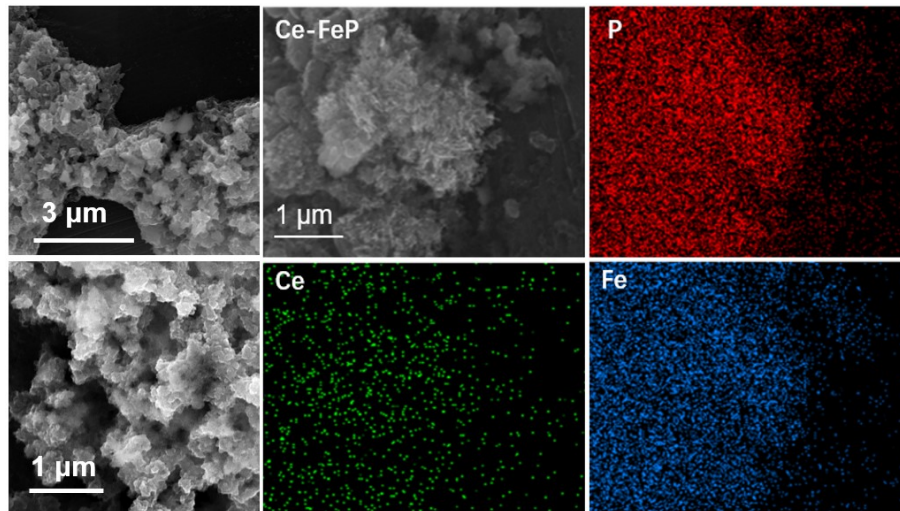

Figure s4. SEM and corresponding element mapping images for Ce-FeP/CC.

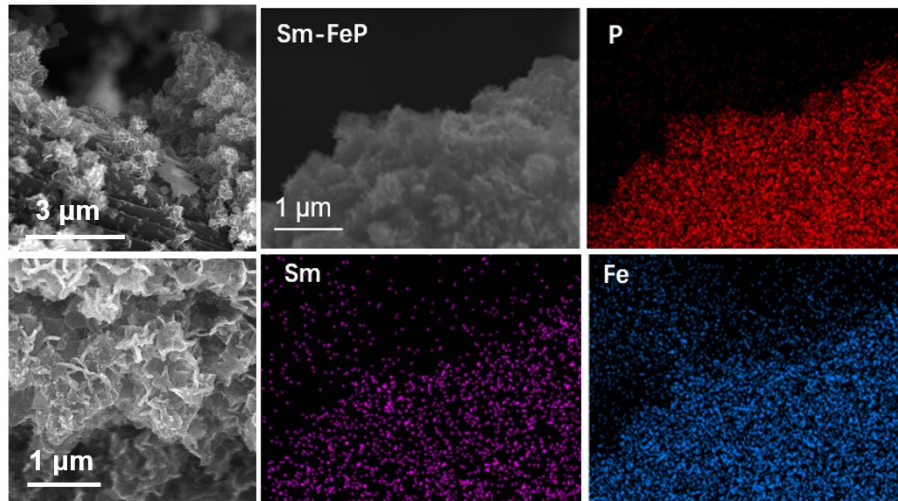

Figure s5. SEM and corresponding element mapping images for Sm-FeP/CC.

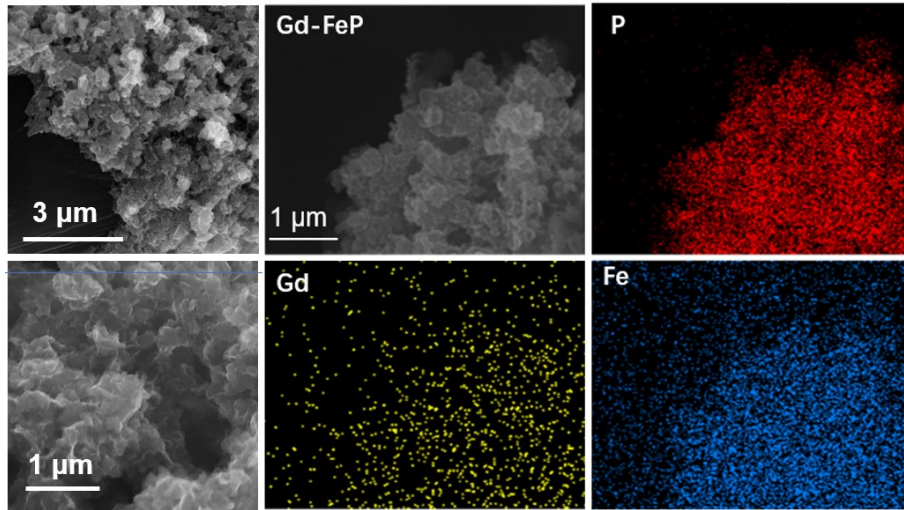

Figure s6. SEM and corresponding element mapping images for Gd-FeP/CC.

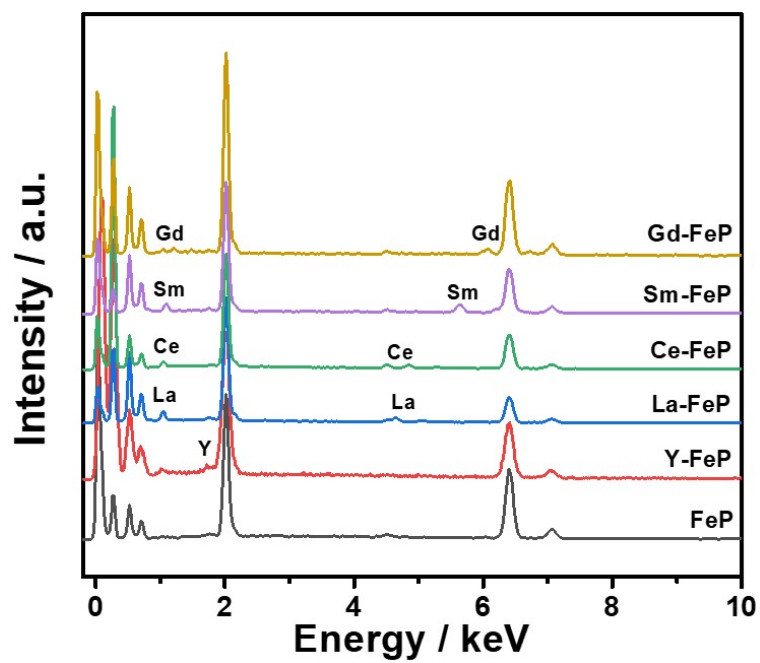

Figure s7. EDS spectra for RE-FeP and FeP samples.



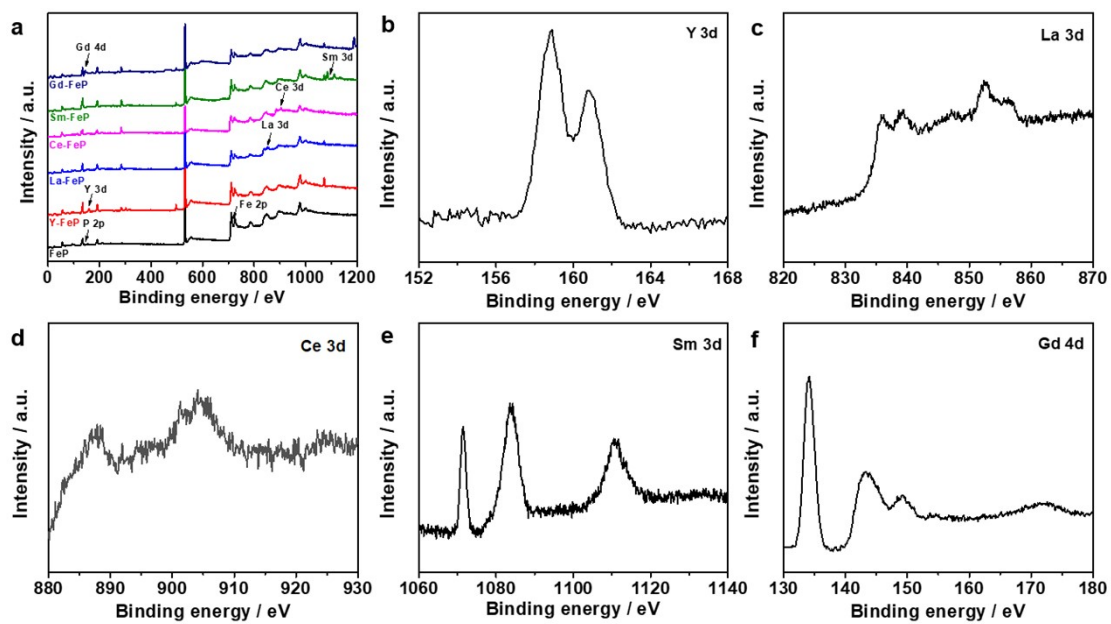

Figure s8. (a) Full spectra and (b-f) high-resolution XPS spectra for various RE-CeP samples.

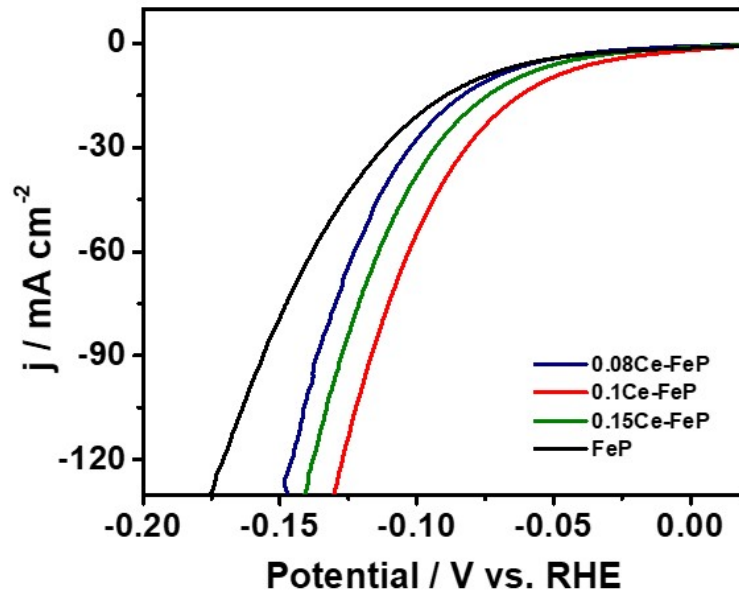

Figure s9. Polarization curves (with  $iR$  corrections) of Ce-FeP/CC with different Ce amounts and FeP/CC for HER in acid solution.

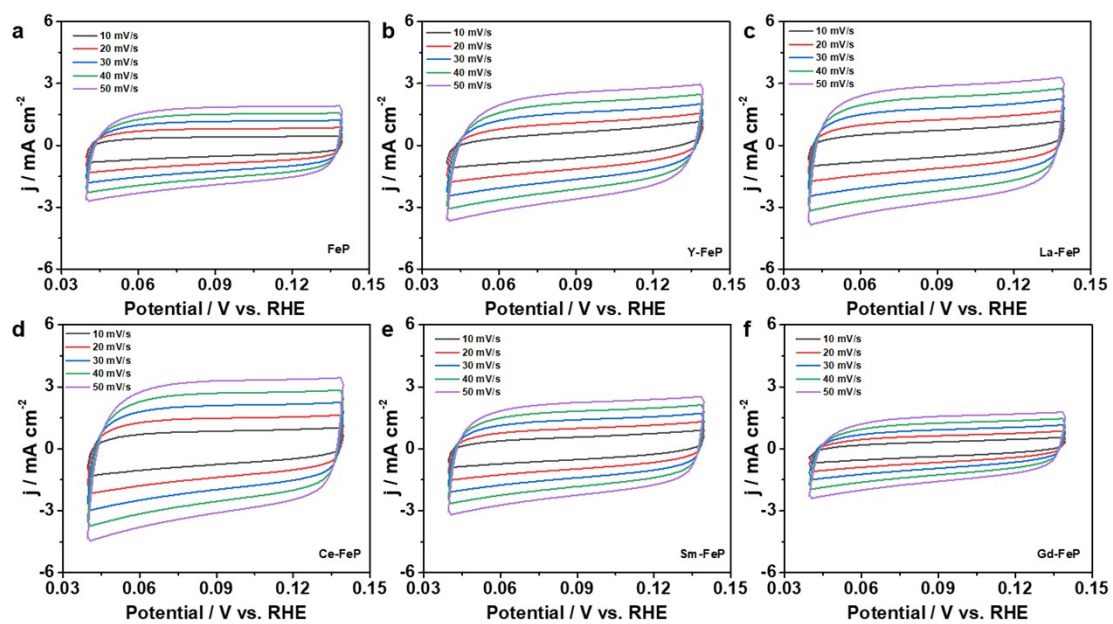

Figure s10. CV curves in 0.5 M H<sub>2</sub>SO<sub>4</sub> for (a) FeP, (b) Y-FeP, (c) La-FeP, (d) Ce-FeP, (e) Sm-FeP, and (f) Gd-FeP with different scan rates.

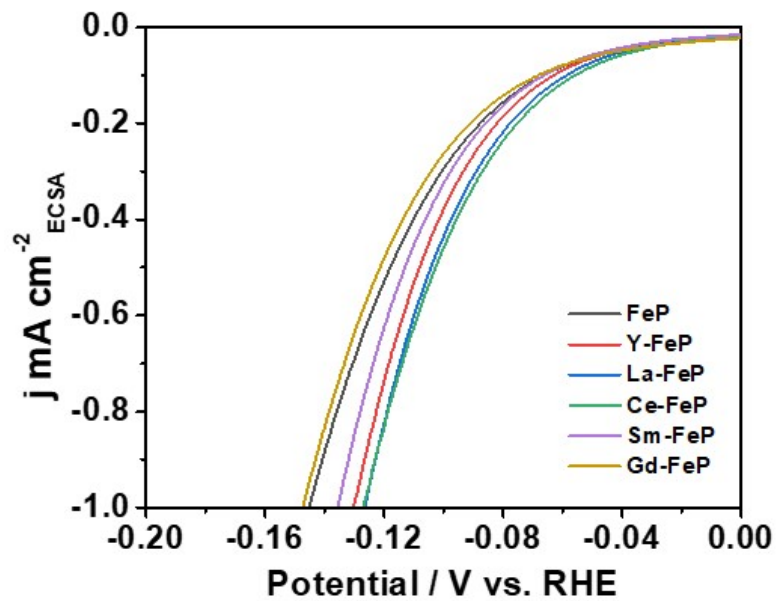

Figure s11. Normalized polarization curves based on ECSA results for FeP and RE-FeP samples in acidic solution.

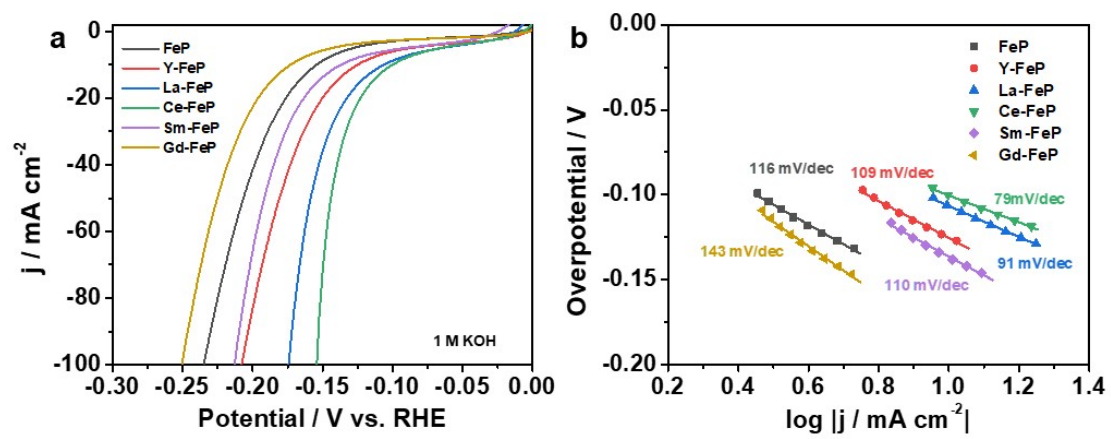

Figure s12. (a) Polarization curves, and corresponding (b) Tafel slopes for various RE-FeP in 1 M KOH solution.

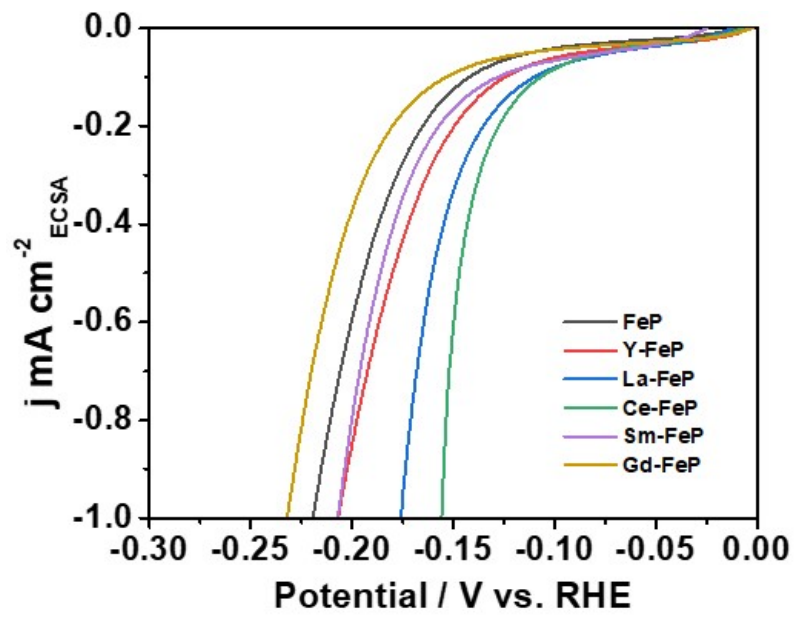

Figure s13. Normalized polarization curves based on ECSA results for FeP and RE-FeP samples in alkaline solution.

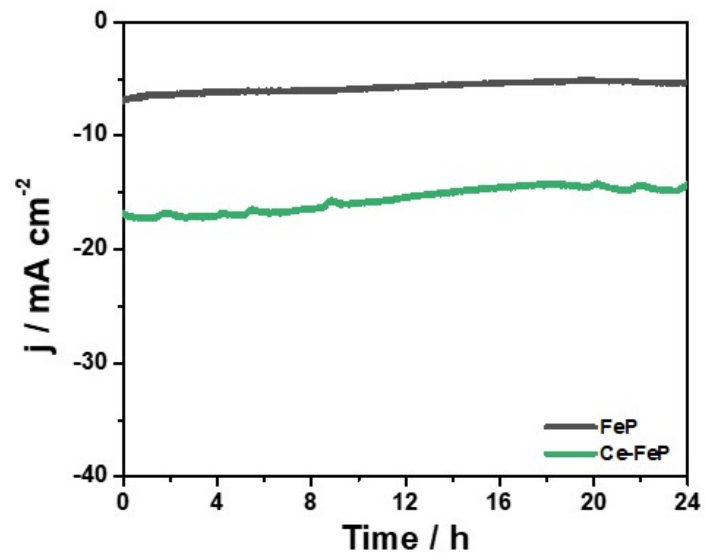

Figure s14. Stability test of Ce-FeP/CC and FeP/CC under the overpotential of 204 mV without  $iR$  corrections in 1 M KOH solution.

Table s1. ICP-AES result for RE-FeP to calculate the molar ratio of RE to Fe.

| Sample | Concentration of Fe<br>/ $\mu\text{mol/mL}$ | Concentration of RE<br>/ $\mu\text{mol/mL}$ | Molar ratio of<br>RE/(Fe+ RE) |
|--------|---------------------------------------------|---------------------------------------------|-------------------------------|
| Y-FeP  | 1.38                                        | 0.09                                        | 6.1%                          |
| La-FeP | 1.0                                         | 0.076                                       | 7.1%                          |
| Ce-FeP | 1.78                                        | 0.165                                       | 8.5%                          |
| Sm-FeP | 1.24                                        | 0.125                                       | 9.2%                          |
| Gd-FeP | 1.27                                        | 0.125                                       | 8.6%                          |



Table s2. Comparison in HER activity for various Fe-based electrocatalysts.

| Catalysts                                             | Electrolyte                          | Overpotential<br>@10mA cm <sup>-2</sup> /mV | Reference                                    |
|-------------------------------------------------------|--------------------------------------|---------------------------------------------|----------------------------------------------|
| Ce-FeP/CC                                             | 0.5 M H <sub>2</sub> SO <sub>4</sub> | 51                                          | this work                                    |
| Ce-FeP/CC                                             | 1 M KOH                              | 100                                         | this work                                    |
| FeP                                                   | 0.5 M H <sub>2</sub> SO <sub>4</sub> | 79                                          | Appl. Catal. B-Environ., 2020, 260, 118156   |
| FeP                                                   | 1 M KOH                              | 95                                          | Appl. Catal. B-Environ., 2020, 260, 118156   |
| FeP@NPC                                               | 0.5 M H <sub>2</sub> SO <sub>4</sub> | 75                                          | Appl. Surf. Sci., 2022, 597, 153662          |
| FeP@NPC                                               | 1 M KOH                              | 109                                         | Appl. Surf. Sci., 2022, 597, 153662          |
| Carbon-shell-coated FeP                               | 0.5 M H <sub>2</sub> SO <sub>4</sub> | 71                                          | J. Am. Chem. Soc., 2017, 139, 6669           |
| FeP/C nanosheets                                      | 0.5 M H <sub>2</sub> SO <sub>4</sub> | 51.1                                        | Adv. Sci., 2019, 6, 1801490                  |
| FeP@PPy/CTs                                           | 0.5 M H <sub>2</sub> SO <sub>4</sub> | 103.1                                       | Chem. Eng. J., 2022, 433, 133643             |
| Ni-doped FeP/C                                        | 0.5 M H <sub>2</sub> SO <sub>4</sub> | 72                                          | Sci. Adv., 2019, 5, eaav6009                 |
| Ni-doped FeP/C                                        | 1 M KOH                              | 95                                          | Sci. Adv., 2019, 5, eaav6009                 |
| MoO <sub>2</sub> -FeP@C                               | 1 M KOH                              | 103                                         | Adv. Mater., 2020, 32, 2000455               |
| NF@NiFe LDH/CeO <sub>x</sub>                          | 1 M KOH                              | 154                                         | ACS Appl. Mater. Interfaces, 2018, 10, 35145 |
| CeFeCoP/NF                                            | 1 M KOH                              | 97                                          | J. Solid State Chem., 2022, 314, 123434      |
| Fe <sub>x</sub> Ni <sub>y</sub> /CeO <sub>2</sub> /NC | 1 M KOH                              | 240                                         | Inorg. Chem. Front., 2020, 7, 470            |
| Er-doped CoP/CC                                       | 0.5 M H <sub>2</sub> SO <sub>4</sub> | 52                                          | J. Mater. Chem. A, 2019, 7, 5769             |
| Ce-doped NiFe-LDH                                     | 1 M KOH                              | 147                                         | Sustainable Energy Fuels, 2020, 4, 312       |

Table s3. Front view, overlook view, and side view for optimized structures of FeP-H and RE-FeP-H structure.

| Sample | Front view | Overlook view | Side view |
|--------|------------|---------------|-----------|
| FeP    |            |               |           |
| Y-FeP  |            |               |           |
| La-FeP |            |               |           |
| Ce-FeP |            |               |           |
| Sm-FeP |            |               |           |
| Gd-FeP |            |               |           |

- Fe
- P
- H
- Y
- La
- Ce
- Sm
- Gd
